Abstract

# MED32/442: Internet Lectures: A five years experience at the University of Vienna

H Kritz; C Najemnik; H Sinzinger

Univ. of Nuklearmedizin AKH Wien, Vienna, Austria

## Abstract

**Introduction:** Internet lectures are a very useful specialized tool to distribute information to interested people. Our experience started 1994 and we want to give a survey.

**Methods:** We started with a special lecture on atherosclerosis and improved the method within the last years. We had a lot of problems with certification and identification procedures, but they are solved now. In the last years we added web casting tools.

**Results:** At this time we have 80- 140 student per term, which are participants of a lectures. These are students attending a certificate course. Additionally we distribute our content over two homepages which we have installed to improve our work <http://www.lipidforum.at>, <http://www.billrothhaus.at> (10000 hits/month).

**Discussion:** Internet will be the most important tool for future teaching. It is an interesting experience to teach students from all over the world and you learn a lot from these people by yourself.

(*J Med Internet Res* 1999;1(suppl1):e69) doi: [10.2196/jmir.1.suppl1.e69](https://doi.org/10.2196/jmir.1.suppl1.e69)

## KEYWORDS

Internet lectures; Medical Education; Atherosclerosis; Webcasting

###Reviewer names will be inserted here### published 19.09.99.

Please cite as:

Kritz H, Najemnik C, Sinzinger H

MED32/442: Internet Lectures: A five years experience at the University of Vienna

*J Med Internet Res* 1999;1(suppl1):e69

URL: <http://www.jmir.org/1999/suppl1/e69/>

doi: [10.2196/jmir.1.suppl1.e69](https://doi.org/10.2196/jmir.1.suppl1.e69)

PMID:

Except where otherwise noted, articles published in the Journal of Medical Internet Research are distributed under the terms of the Creative Commons Attribution License (<http://www.creativecommons.org/licenses/by/2.0/>), which permits unrestricted use, distribution, and reproduction in any medium, provided the original work is properly cited.
